# Supplementary material for: Artificial intelligence in liver diseases: Improving diagnostics, prognostics and response prediction
Source: PubMed Central journal article supplement (PMC8867112; doi:10.1016/j.jhepr.2022.100443), 2022-02-02
Supplement: mmc1.pdf [file mmc1.pdf]

# **Artificial intelligence in liver diseases: improving diagnostics, prognostics and response prediction**

David Nam, Julius Chapiro, Valerie Paradis, Tobias Paul Seraphin, Jakob Nikolas Kather

Table of contents

|                                          |    |
|------------------------------------------|----|
| Supplementary materials and methods..... | 2  |
| Table S1.....                            | 3  |
| Table S2.....                            | 5  |
| Supplementary references.....            | 13 |

# **Supplementary materials and methods**

## **Literature search**

On 8th September 2021 we performed a systematic literature search on the PubMed Database (<https://pubmed.ncbi.nlm.nih.gov/>) using the following search terms: “(("Artificial Intelligence") OR ("AI") OR ("Machine learning") OR ("Deep Learning")) AND (("Liver disease") OR ("NASH") OR ("NAFLD") OR ("HCC") OR ("Liver cancer")) AND ((Radiology) OR (Pathology)) AND ((diagnostics) OR (prognostics) OR (treatment))”. We excluded studies published before 1st January 2010. The search resulted in 686 articles which have been subsequently screened by abstract and title, using the systematic review tool Rayyan (<https://www.rayyan.ai/>) [112]. Our inclusion criteria were the following: 1. Human study, 2. Artificial intelligence/Deep Learning/Machine Learning methods used, 3. Related to pathology or radiology as clinical fields, 4. Method used for diagnostics, pronostics or treatment responses, 5. Dealing with liver diseases. The remaining 112 publications were then analyzed. No time restriction was applied. All search results were studies published between 7th January 2012 and 9th January 2021.

## **Data analysis for Figure 1**

Figure 1A: “Others” includes countries with a maximum of two counts: Canada, Egypt, Hong Kong, Switzerland, Taiwan, Thailand, UK. Figure 1B: “Others” includes two technical papers and two studies combining diagnosis and prognosis. Figure 1C: “Other CLDs” includes diseases with a maximum of three counts. Figure 1D: “Others” includes input data with a maximum of one count.

## Supplementary tables

| Study                     | Year | Modality        | HC/DL | Disease   | Algorithm                                       | Prediction          | Highlight                                                                                    |
|---------------------------|------|-----------------|-------|-----------|-------------------------------------------------|---------------------|----------------------------------------------------------------------------------------------|
| Vanderbeck S et al. [23]  | 2014 | H&E             | HC    | NAFLD     | SVM                                             | Diagnosis           | Identify morphological tissue features                                                       |
| Vanderbeck S et al. [113] | 2015 | H&E             | HC    | NAFLD     | SVM                                             | Diagnosis           | Detect lobular inflammation and hepatocellular ballooning                                    |
| Li S et al.[32]           | 2017 | N/A             | DL    | HCC       | CNN                                             | Diagnosis           | HCC nuclei grading                                                                           |
| Forlano R et al.[24]      | 2020 | H&E, Sirius Red | HC    | NAFLD     | K-means                                         | Diagnosis           | Quantification of Steatosis, Inflammation, Ballooning and Fibrosis, diagnosing NASH          |
| Gawrieh S et al. [28]     | 2020 | Trichrome stain | HC    | NAFLD     | SVM                                             | Diagnosis           | Quantification and classification of hepatic fibrosis                                        |
| Kiani A et al.[37]        | 2020 | H&E             | DL    | HCC, CCC  | CNN                                             | Diagnosis           | Classifying HCC vs. CCC and exploring the influence of the model on pathologists decisions   |
| Leow WQ et al.[25]        | 2020 | Unstained       | HC    | NASH      | Linear regression, sequential feature selection | Diagnosis           | Stratifying stage 1 and 2 NASH fibrosis                                                      |
| Liao H et al.[38]         | 2020 | H&E             | HC    | HCC       | RF, PCA                                         | Diagnosis/Prognosis | Distinguish HCC from healthy liver and develop a risk score associated with overall survival |
| Roy M et al.[26]          | 2020 | H&E             | DL    | Steatosis | CNN                                             | Segmentation        | Quantification of Steatosis                                                                  |
| Saillard C et al.[40]     | 2020 | H&E             | DL    | HCC       | CNN                                             | Prognosis           | Survival after resection of HCC                                                              |
| Sun C et al.[35]          | 2020 | H&E             | DL    | HCC       | CNN                                             | Diagnosis           | Multiple instance learning model to diagnose HCC                                             |
| Teramoto T et al.[20]     | 2020 | H&E             | HC    | NAFLD     | SVM                                             | Diagnosis           | Quantifying hepatocellular ballooning and classifying NASH and non-NASH NAFLD                |

|                             |      |                      |    |           |                           |                 |                                                                                                          |
|-----------------------------|------|----------------------|----|-----------|---------------------------|-----------------|----------------------------------------------------------------------------------------------------------|
| Wang R et al.[34]           | 2020 | Hyperspectral images | DL | HCC       | CNN                       | Diagnosis       | Diagnosing HCC from hyperspectral data of liver biopsies                                                 |
| Aatresh AA et al. [29]      | 2021 | H&E                  | DL | HCC       | CNN                       | Diagnosis       | Classification of HCC in 4 histopathology classes                                                        |
| Khened M et al. [30]        | 2021 | H&E                  | DL | HCC       | CNN                       | Technical paper | End-to-end pipeline for Liver tissue segmentation and diagnosis of HCC                                   |
| Lal S et al. [33]           | 2021 | H&E                  | DL | Cancer    | CNN                       | Segmentation    | Segmentation of nuclei from liver cancer tissue                                                          |
| Pérez-Sanz F et al. [21]    | 2021 | Sudan                | HC | Steatosis | SVM, KNN, NN, Naive-Bayes | Diagnosis       | Quantification of macrovesicular steatosis in donor livers                                               |
| Qu H et al.[22]             | 2021 | H&E, trichrome       | DL | NAFLD     | CNN                       | Diagnosis       | Prediction of NAFLD Activity score and fibrosis stage                                                    |
| Roy M et al. [36]           | 2021 | H&E                  | DL | HCC       | CNN                       | Segmentation    | HCC segmentation and classification of tumorous liver tissue                                             |
| Saito A et al. [39]         | 2021 | H&E                  | HC | HCC       | SVM                       | Prognosis       | Nuclei features for the prediction of recurrence after HCC resection                                     |
| Shi JY et al.[41]           | 2021 | H&E                  | DL | HCC       | CNN                       | Prognosis       | Development of a tumor risk score evaluating patients' outcomes                                          |
| Taylor-Weiner A et al. [27] | 2021 | H&E                  | DL | NASH      | CNN                       | Prognosis       | Quantification of morphological features of NASH, fibrosis staging and prediction of disease progression |
| Wang X et al. [31]          | 2021 | H&E                  | DL | HCC       | CNN                       | Segmentation    | Segmentation of HCC in liver tissue                                                                      |
| Yamashita R et al. [42]     | 2021 | H&E                  | DL | HCC       | CNN                       | Prognosis       | Prediction of postsurgical recurrence in HCC                                                             |

**Table S1. AI studies in liver histopathology.**

| Study                    | Year | Modality            | HC/D<br>L | Disease            | Algorithm                                                                    | Prediction             | Application                                                                        |
|--------------------------|------|---------------------|-----------|--------------------|------------------------------------------------------------------------------|------------------------|------------------------------------------------------------------------------------|
| Acharya UR et al. [114]  | 2012 | Ultrasound          | HC        | FLD                | Decision tree classifier                                                     | Diagnosis              | Classification of normal vs. abnormal livers affected by fatty liver disease       |
| Jiang H et al. [115]     | 2013 | CT                  | HC        | Cancer             | SVM, particle swarm and local optimization                                   | Diagnosis              | Classification of normal liver, liver cancer, liver cirrhosis, and liver cyst      |
| Kadoury S et al. [116]   | 2015 | CT                  | HC        | Cancer             | Discriminant Grassmanian manifolds, conditional random fields                | Segmentation           | Metastatic liver tumor segmentation                                                |
| Huang L et al. [117]     | 2016 | CT                  | HC        | Cancer, hemangioma | Single-block linear detection                                                | Segmentation           | Liver segmentation                                                                 |
| Conze PH et al. [118]    | 2017 | CT                  | HC        | HCC                | RF, hierarchical multi-scale tree                                            | Segmentation           | HCC tumor segmentation                                                             |
| Gatos I et al. [119]     | 2017 | Ultrasound          | HC        | CLD                | Stepwise regression analysis, SVM                                            | Diagnosis              | Classification of healthy vs. chronic liver disease-affected livers                |
| Vorontsov E et al. [120] | 2017 | CT                  | DL        | Tumor              | Multilayer perceptron NN, deformable model                                   | Segmentation           | Metastatic liver tumor segmentation                                                |
| Abajian A et al. [85]    | 2018 | MRI + clinical data | HC        | HCC                | LR, RF                                                                       | Prognosis              | Prediction of response to TACE in HCC patients                                     |
| Acharya UR et al. [121]  | 2018 | Ultrasound          | HC        | Lesions            | Bidirectional empirical mode decomposition, particle swarm optimization, PNN | Diagnosis              | Classification of normal liver as well as benign and malignant focal liver lesions |
| Biswas M et al. [68]     | 2018 | Ultrasound          | DL        | FLD                | CNN                                                                          | Diagnosis              | Detection of and risk stratification for fatty liver disease                       |
| Byra M et al. [69]       | 2018 | Ultrasound          | DL        | FLD                | CNN, SVM, LASSO linear regression                                            | Diagnosis              | Detection of fatty liver disease and quantification of hepatic steatosis           |
| Choi KJ et al. [73]      | 2018 | CT                  | DL        | Fibrosis           | CNN                                                                          | Segmentation/Diagnosis | Fibrosis stage classification                                                      |
| Li X et al. [64]         | 2018 | CT                  | DL        | Lesions            | CNN                                                                          | Segmentation           | Liver and liver lesion segmentation                                                |

|                         |      |                                        |    |                             |                                                                 |                        |                                                                                                            |
|-------------------------|------|----------------------------------------|----|-----------------------------|-----------------------------------------------------------------|------------------------|------------------------------------------------------------------------------------------------------------|
| Ahn SH et al. [122]     | 2019 | CT                                     | DL | Organ segmentation          | CNN                                                             | Segmentation           | Segmentation of liver and organs at risk during radiation planning                                         |
| Feng ST et al. [81]     | 2019 | MRI                                    | HC | HCC                         | LASSO LR, LR                                                    | Diagnosis              | Preoperative MVI prediction in HCC patients who underwent curative hepatectomy                             |
| Gatos I et al. [123]    | 2019 | Ultrasound                             | DL | Fibrosis                    | CNN                                                             | Diagnosis              | Mask separating high and low temporal stability areas, classification of fibrosis in chronic liver disease |
| Graffy PM et al. [70]   | 2019 | CT                                     | DL | Steatosis                   | CNN                                                             | Segmentation           | Quantification of liver steatosis                                                                          |
| Guo D et al. [124]      | 2019 | CT + clinical data                     | HC | HCC                         | LASSO, Cox                                                      | Prognosis              | Prediction of HCC recurrence after liver transplantation                                                   |
| Hamm CA et al. [76]     | 2019 | MRI                                    | DL | Lesions                     | CNN                                                             | Diagnosis              | Classification of hepatic lesions                                                                          |
| He L et al. [125]       | 2019 | MRI + clinical data                    | HC | Fibrosis                    | LASSO, SVM                                                      | Diagnosis              | Classification of liver stiffness                                                                          |
| Huo Y et al. [126]      | 2019 | CT                                     | DL | NAFLD                       | CNN                                                             | Segmentation/Diagnosis | Quantification of liver attenuation and detection of NAFLD                                                 |
| Jansen MJA et al. [127] | 2019 | MRI + clinical data                    | HC | Lesions                     | Extremely randomized trees classifier                           | Diagnosis              | Classification of liver lesions                                                                            |
| Ji GW et al. [128]      | 2019 | CT + clinical data + radiological data | HC | HCC                         | MRMR, RSF, LASSO Cox, unsupervised hierarchical clustering, Cox | Prognosis              | Prediction of HCC recurrence after curative resection                                                      |
| Nayak A et al. [129]    | 2019 | CT                                     | HC | HCC                         | LR, SVM                                                         | Segmentation/Diagnosis | Liver segmentation, classification of healthy, cirrhosis, and cirrhosis with HCC livers                    |
| Ouhmich F et al. [130]  | 2019 | CT                                     | DL | HCC                         | CNN                                                             | Segmentation           | Segmentation of liver parenchyma, active and necrotic tumor                                                |
| Oyama A et al. [131]    | 2019 | MRI                                    | HC | HCC, metastasis, hemangioma | Texture analysis and LDA, topological data analysis and XGBoost | Diagnosis              | Classification of HCC, metastasis, and hepatic hemangioma                                                  |

|                       |      |                    |    |                     |                                                                                       |                           |                                                                                                                                                                                      |
|-----------------------|------|--------------------|----|---------------------|---------------------------------------------------------------------------------------|---------------------------|--------------------------------------------------------------------------------------------------------------------------------------------------------------------------------------|
| Shan QY et al. [132]  | 2019 | CT                 | HC | HCC                 | LASSO linear regression                                                               | Prognosis                 | Prediction of early HCC recurrence after curative resection or ablation                                                                                                              |
| Wang CJ et al. [107]  | 2019 | MRI                | DL | Lesions             | CNN                                                                                   | Diagnosis                 | Follow-up study to Hamm CA et al. [76] for identification of features contributing to lesion classification, generation of feature maps, and calculation of feature relevance scores |
| Wang K et al. [133]   | 2019 | CT + MRI           | DL | None                | CNN                                                                                   | Segmentation              | Liver segmentation, computation of liver volume and hepatic proton density fat fraction                                                                                              |
| Wang K et al. [72]    | 2019 | Ultrasound         | DL | Fibrosis            | CNN                                                                                   | Diagnosis                 | Fibrosis stage classification                                                                                                                                                        |
| Wang W et al. [134]   | 2019 | CT + clinical data | DL | HCC                 | CNN                                                                                   | Prognosis                 | Prediction of early HCC recurrence after resection                                                                                                                                   |
| Yang DW et al. [135]  | 2019 | MRI                | DL | HCC                 | CNN                                                                                   | Diagnosis                 | Diagnosis of HCC pathologic grade                                                                                                                                                    |
| Ahmed Y et al. [136]  | 2020 | MRI                | HC | Fibrosis            | SVM                                                                                   | Diagnosis                 | Classification of normal or fibrotic liver                                                                                                                                           |
| Budai BK et al. [137] | 2020 | CT                 | HC | Fibrosis            | K-means, hierarchical cluster analysis, linear regression, PCA,, RF, SVM, RFE         | Diagnosis                 | Classification of low-grade and high-grade fibrosis                                                                                                                                  |
| Cao SE et al. [138]   | 2020 | CT                 | DL | Focal liver lesions | CNN                                                                                   | Diagnosis                 | Classification of focal liver lesions                                                                                                                                                |
| Chen WF et al. [139]  | 2020 | CT                 | DL | Tumor               | CNN                                                                                   | Segmentation              | Liver and lesion segmentation                                                                                                                                                        |
| Doman K et al. [140]  | 2020 | CT                 | DL | Metastasis          | Lesion image generation with Poisson blending, CT value distribution, and DCGANs; CNN | Technical Paper/Diagnosis | Detection of liver metastasis                                                                                                                                                        |
| Han A et al.[71]      | 2020 | Ultrasound         | DL | NAFLD               | CNN                                                                                   | Diagnosis                 | NAFLD diagnosis and hepatic fat quantification                                                                                                                                       |
| Hu HT et al. [89]     | 2020 | CT                 | HC | HCC                 | LASSO                                                                                 | Prognosis                 | Prediction of early HCC recurrence after resection or ablation                                                                                                                       |

|                          |      |                                        |        |                                              |                                              |                        |                                                                                                     |
|--------------------------|------|----------------------------------------|--------|----------------------------------------------|----------------------------------------------|------------------------|-----------------------------------------------------------------------------------------------------|
| Kagadis GC et al. [141]  | 2020 | Ultrasound                             | DL     | CLD                                          | CNN                                          | Diagnosis              | Fibrosis stage classification                                                                       |
| Kim J et al. [142]       | 2020 | MRI                                    | DL     | HCC                                          | CNN                                          | Diagnosis              | HCC detection                                                                                       |
| Li Q et al. [143]        | 2020 | CT                                     | DL     | Fibrosis                                     | CNN                                          | Diagnosis              | Fibrosis stage classification                                                                       |
| Liang W et al. [144]     | 2020 | CT + MRI + clinical data               | HC     | HCC, hepatic epithelioid angiomyolipoma, FNH | Mutual information, RF, LR                   | Diagnosis              | Classification of hepatic epithelioid angiomyolipoma from HCC and FNH                               |
| Liu QP et al. [145]      | 2020 | CT + clinical data + radiological data | HC, DL | HCC                                          | RF, SVM, DAE, time-varying DL algorithm, Cox | Diagnosis/Prognosis    | Predictions for MVI, Edmondson-Steiner grade, and prognosis/survival after TACE                     |
| Mao B et al. [146]       | 2020 | CT + clinical data                     | HC     | HCC                                          | RFE, XGBoost                                 | Diagnosis              | HCC pathologic grade prediction                                                                     |
| Mokrane FZ et al. [147]  | 2020 | CT                                     | HC     | HCC                                          | KNN, RF                                      | Diagnosis              | HCC diagnosis in a cirrhotic background with indeterminate liver nodules on, HCCrisk stratification |
| Nebbia G et al. [148]    | 2020 | MRI                                    | HC     | HCC                                          | LASSO, SVM                                   | Diagnosis              | MVI prediction                                                                                      |
| Oezdemir I et al. [149]  | 2020 | Ultrasound                             | HC     | HCC                                          | Distance-weighted discrimination method      | Prognosis              | Prediction of response to TACE                                                                      |
| Peng J et al. [87]       | 2020 | CT                                     | DL     | HCC                                          | CNN                                          | Prognosis              | Prediction of response to TACE                                                                      |
| Ponnoprat D et al. [150] | 2020 | CT                                     | DL, HC | HCC, CCC                                     | CNN, SVM                                     | Segmentation/Diagnosis | Classification of HCC and intrahepatic cholangiocarcinoma                                           |
| Schawkat K et al. [151]  | 2020 | MRI                                    | HC     | Fibrosis                                     | PCA, SVM                                     | Diagnosis              | Fibrosis stage classification                                                                       |
| Shi W et al. [152]       | 2020 | CT                                     | DL     | HCC                                          | CNN                                          | Diagnosis              | Classification of HCC from other focal liver lesions                                                |
| Son JH et al. [153]      | 2020 | CT                                     | DL     | CLD                                          | CNN                                          | Segmentation/Diagnosis | Fibrosis stage classification, correlation of liver and spleen volumetrics with fibrosis stage      |



|                          |      |                                                |         |         |                                                              |                                   |                                                                                                |
|--------------------------|------|------------------------------------------------|---------|---------|--------------------------------------------------------------|-----------------------------------|------------------------------------------------------------------------------------------------|
| Wei L et al. [154]       | 2020 | CT + PET + dosimetry data                      | HC      | Lesions | LASSO LR, LASSO Cox                                          | Prognosis                         | Prediction of lesion-level response to radioembolization and lesion-level progression          |
| Wu Y et al. [155]        | 2020 | MRI                                            | DL      | HCC     | CNN                                                          | Diagnosis                         | Classification of LI-RADS grade 3 from LI-RADS grade 4 and 5 lesions                           |
| Yang Q et al. [156]      | 2020 | Ultrasound + clinical data + radiological data | DL      | Lesions | CNN, LR                                                      | Diagnosis                         | Classification of benign and malignant focal liver lesions                                     |
| Zhang L et al. [157]     | 2020 | CT + clinical data                             | DL      | HCC     | CNN, MRMR, Elastic Net, Cox                                  | Prognosis                         | Overall survival prediction in HCC patients treated with TACE and sorafenib                    |
| Zhen SH et al. [108]     | 2020 | MRI + clinical data                            | DL      | Tumor   | CNN                                                          | Diagnosis                         | Classification of liver tumors                                                                 |
| Bousabarah K et al. [65] | 2021 | MRI                                            | DL + HC | HCC     | CNN, RF                                                      | Segmentation                      | Segmentation of liver and HCC                                                                  |
| Byra M et al. [158]      | 2021 | Ultrasound                                     | DL      | NAFLD   | CNN, LR, LASSO                                               | Diagnosis                         | Diagnosis of fatty liver and advanced steatosis, quantification of proton density fat fraction |
| Che H et al. [159]       | 2021 | Ultrasound                                     | DL      | NAFLD   | CNN                                                          | Diagnosis                         | NAFLD classification                                                                           |
| Chen W et al. [160]      | 2021 | CT                                             | HC      | HCC     | LASSO, SVM                                                   | Diagnosis                         | Differentiation between low-grade and high-grade HCC                                           |
| Chen Y et al. [161]      | 2021 | MRI                                            | DL      | HCC     | CNN, GDBT, Cox                                               | Segmentation/Diagnosis /Prognosis | Preoperative prediction of cytokeratin 19 expression and analysis of recurrence-free survival  |
| Chen Y et al. [162]      | 2021 | MRI                                            | HC      | HCC     | LASSO, KNN, SVM, LR, XGBoost                                 | Diagnosis                         | MVI prediction                                                                                 |
| Das A et al. [163]       | 2021 | Ultrasound                                     | HC      | NAFLD   | SVM, multi-layered perceptron NN, XGBoost, ensemble learning | Diagnosis                         | Classification of NAFLD from normal liver                                                      |
| Gao F et al. [164]       | 2021 | MRI                                            | DL + HC | HCC     | CNN, LASSO LR, ensemble learning                             | Diagnosis                         | MVI prediction                                                                                 |

|                           |      |                                        |         |           |                |                        |                                                                                                                  |
|---------------------------|------|----------------------------------------|---------|-----------|----------------|------------------------|------------------------------------------------------------------------------------------------------------------|
| He K et al. [66]          | 2021 | CT                                     | DL      | Tumor     | CNN            | Segmentation           | Segmentation of tumor and ablation zone                                                                          |
| Jiang YQ et al. [82]      | 2021 | CT + clinical data + radiological data | DL + HC | HCC       | CNN, XGBoost   | Diagnosis              | MVI prediction                                                                                                   |
| Jin Z et al. [88]         | 2021 | CT + clinical data + radiological data | HC      | HCC       | LDA, Bayes, LR | Prognosis              | Prediction of extrahepatic spread and macrovascular invasion in HCC patients who underwent TACE                  |
| Kim DW et al. [165]       | 2021 | CT                                     | DL      | Lesions   | CNN            | Segmentation/Diagnosis | Detection of primary liver tumors                                                                                |
| Li H et al. [166]         | 2021 | MRI + clinical data                    | DL      | CLD       | CNN            | Diagnosis              | Liver stiffness classification                                                                                   |
| Liu P et al. [167]        | 2021 | CT                                     | HC      | HCC       | LASSO, LR      | Diagnosis              | MVI prediction                                                                                                   |
| Liu X et al. [168]        | 2021 | CT + MRI                               | HC      | HCC, CCC  | PCA, SVM       | Diagnosis              | Differentiation of combined HCC and CCC, CCC, as well as CCC                                                     |
| Nakai H et al. [169]      | 2021 | CT                                     | DL      | HCC, CCC  | CNN            | Diagnosis              | Differentiation of moderately differentiated HCC, poorly differentiated HCC, and intrahepatic cholangiocarcinoma |
| Nowak S et al. [170]      | 2021 | MRI                                    | DL      | Cirrhosis | CNN            | Segmentation/Diagnosis | Diagnosis of cirrhosis                                                                                           |
| Oestmann PM et al. [77]   | 2021 | MRI                                    | DL      | HCC       | CNN            | Diagnosis              | Lesion characterization, classification of typical HCC and atypical HCC from non-HCC                             |
| Pickhardt PJ et al. [171] | 2021 | CT                                     | DL      | NAFLD     | CNN            | Segmentation           | Steatosis characterization                                                                                       |
| Sheng R et al. [172]      | 2021 | MRI                                    | DL      | HCC       | CNN            | Segmentation/Diagnosis | Semi-automation of LI-RADS grading                                                                               |
| Song D et al. [83]        | 2021 | MRI + clinical data                    | DL      | HCC       | CNN            | Diagnosis              | MVI status and MVI grade prediction                                                                              |

|                                |      |                           |         |          |                                              |                        |                                                   |
|--------------------------------|------|---------------------------|---------|----------|----------------------------------------------|------------------------|---------------------------------------------------|
| Tiyarattanachai T et al. [173] | 2021 | Ultrasound                | DL      | Lesions  | CNN                                          | Diagnosis              | Diagnosis of liver lesions                        |
| Wan Y et al. [174]             | 2021 | MRI                       | DL      | Lesions  | CNN                                          | Diagnosis              | Diagnosis of liver lesions                        |
| Wang M et al. [175]            | 2021 | CT                        | DL      | HCC      | CNN                                          | Diagnosis              | Diagnosis of HCC                                  |
| Wei L et al. [109]             | 2021 | CT + clinical data        | DL + HC | HCC      | CNN, VAE                                     | Prognosis              | Survival in HCC patients treated with SBRT        |
| Zhang Y et al. [176]           | 2021 | MRI                       | DL      | HCC      | CNN                                          | Diagnosis              | MVI prediction                                    |
| Zheng R et al. [177]           | 2021 | MRI                       | DL + HC | Fibrosis | CNN, LASSO LR, Gaussian Naive Bayes, SVM, LR | Segmentation/Diagnosis | Fibrosis stage classification                     |
| Zhou B et al. [67]             | 2021 | CT + MRI                  | DL      | HCC      | CNN                                          | Segmentation           | Multimodal registration and segmentation for TACE |
| Zhou W et al. [84]             | 2021 | MRI                       | DL      | HCC      | CNN                                          | Diagnosis              | MVI prediction                                    |
| He T et al. [14]               | 2021 | MRI + WSI + clinical data | DL      | HCC      | CNN, NLP, RBF NN, multilayer perceptron NN   | Segmentation/Prognosis | Recurrence of HCC after liver transplantation     |

**Table S2. AI studies in liver radiology.**

Abbreviations for Supplementary Tables S1 and S2:

CCC = cholangiocellular carcinoma

CLD = chronic liver disease

CNN = convolutional neural network

CT = computed tomography

DAE = deep auto-encoder

DCGAN = deep convolutional generative adversarial networks

DL = deep learning

FLD = fatty liver disease

FNH = focal nodular hyperplasia

GDBT = gradient boosting tree

H&E = hematoxylin and eosin

HC = handcrafted features

HCC = hepatocellular carcinoma

KNN = K-nearest neighbors

LASSO = least absolute shrinkage and selection operator

LDA = linear discriminant analysis

LR = logistic regression

MRI = magnetic resonance imaging

MRMR = maximum relevance minimum redundancy

MVI = microvascular invasion

NAFLD = nonalcoholic fatty liver disease

NASH = nonalcoholic steatohepatitis

NLP = natural language processing

NN = neural network

PCA = principal component analysis

PNN = probabilistic neural network

RBF NN = radial basis function neural network

RF = random forest

RFE = recursive feature elimination

SVM = support vector machine

TACE = transarterial chemoembolization

VAE = variational auto-encoder

XGBoost= eXtreme Gradient Boosting

## **Additional references for supplementary tables**

- [112] Ouzzani M, Hammady H, Fedorowicz Z, Elmagarmid A. Rayyan-a web and mobile app for systematic reviews. *Syst Rev* 2016;5:210.
- [113] Vanderbeck S, Bockhorst J, Kleiner D, Komorowski R, Chalasani N, Gawrieh S. Automatic quantification of lobular inflammation and hepatocyte ballooning in nonalcoholic fatty liver disease liver biopsies. *Hum Pathol* 2015;46:767–75.
- [114] Acharya UR, Sree SV, Ribeiro R, Krishnamurthi G, Marinho RT, Sanches J, et al. Data mining framework for fatty liver disease classification in ultrasound: a hybrid feature extraction paradigm. *Med Phys* 2012;39:4255–64.
- [115] Jiang H, Zheng R, Yi D, Zhao D. A novel multiinstance learning approach for liver cancer recognition on abdominal CT images based on CPSO-SVM and IO. *Comput Math Methods Med* 2013;2013:434969.
- [116] Kadoury S, Vorontsov E, Tang A. Metastatic liver tumour segmentation from discriminant Grassmannian manifolds. *Phys Med Biol* 2015;60:6459–78.
- [117] Huang L, Weng M, Shuai H, Huang Y, Sun J, Gao F. Automatic Liver Segmentation from CT Images Using Single-Block Linear Detection. *Biomed Res Int* 2016;2016:9420148.
- [118] Conze P-H, Noblet V, Rousseau F, Heitz F, de Blasi V, Memeo R, et al. Scale-adaptive supervoxel-based random forests for liver tumor segmentation in dynamic contrast-enhanced CT scans. *Int J Comput Assist Radiol Surg* 2017;12:223–33.
- [119] Gatos I, Tsantis S, Spiliopoulos S, Karnabatidis D, Theotokas I, Zoumpoulis P, et al. A Machine-Learning Algorithm Toward Color Analysis for Chronic Liver Disease Classification, Employing Ultrasound Shear Wave Elastography. *Ultrasound Med Biol* 2017;43:1797–810.
- [120] Vorontsov E, Tang A, Roy D, Pal CJ, Kadoury S. Metastatic liver tumour segmentation with a neural network-guided 3D deformable model. *Med Biol Eng Comput* 2017;55:127–39.
- [121] Acharya UR, Koh JEW, Hagiwara Y, Tan JH, Gertych A, Vijayanathan A, et al. Automated diagnosis of focal liver lesions using bidirectional empirical mode decomposition features. *Comput Biol Med* 2018;94:11–8.
- [122] Ahn SH, Yeo AU, Kim KH, Kim C, Goh Y, Cho S, et al. Comparative clinical evaluation of atlas and deep-learning-based auto-segmentation of organ structures in liver cancer. *Radiat Oncol* 2019;14:213.
- [123] Gatos I, Tsantis S, Spiliopoulos S, Karnabatidis D, Theotokas I, Zoumpoulis P, et al. Temporal stability assessment in shear wave elasticity images validated by deep learning neural network for chronic liver disease fibrosis stage assessment. *Med Phys* 2019;46:2298–309.
- [124] Guo D, Gu D, Wang H, Wei J, Wang Z, Hao X, et al. Radiomics analysis enables recurrence prediction for hepatocellular carcinoma after liver transplantation. *Eur J Radiol* 2019;117:33–40.
- [125] He L, Li H, Dudley JA, Maloney TC, Brady SL, Somasundaram E, et al. Machine Learning Prediction of Liver Stiffness Using Clinical and T2-Weighted MRI Radiomic Data. *AJR Am J Roentgenol* 2019;213:592–601.
- [126] Huo Y, Terry JG, Wang J, Nair S, Lasko TA, Freedman BI, et al. Fully automatic liver attenuation estimation combining CNN segmentation and morphological operations. *Med Phys* 2019;46:3508–19.
- [127] Jansen MJA, Kuijff HJ, Veldhuis WB, Wessels FJ, Viergever MA, Pluim JPW.

Automatic classification of focal liver lesions based on MRI and risk factors. *PLoS One* 2019;14:e0217053.

- [128] Ji G-W, Zhu F-P, Xu Q, Wang K, Wu M-Y, Tang W-W, et al. Machine-learning analysis of contrast-enhanced CT radiomics predicts recurrence of hepatocellular carcinoma after resection: A multi-institutional study. *EBioMedicine* 2019;50:156–65.
- [129] Nayak A, Baidya Kayal E, Arya M, Culli J, Krishan S, Agarwal S, et al. Computer-aided diagnosis of cirrhosis and hepatocellular carcinoma using multi-phase abdomen CT. *Int J Comput Assist Radiol Surg* 2019;14:1341–52.
- [130] Ouhmich F, Agnus V, Noblet V, Heitz F, Pessaux P. Liver tissue segmentation in multiphase CT scans using cascaded convolutional neural networks. *Int J Comput Assist Radiol Surg* 2019;14:1275–84.
- [131] Oyama A, Hiraoka Y, Obayashi I, Saikawa Y, Furui S, Shiraishi K, et al. Hepatic tumor classification using texture and topology analysis of non-contrast-enhanced three-dimensional T1-weighted MR images with a radiomics approach. *Sci Rep* 2019;9:8764.
- [132] Shan Q-Y, Hu H-T, Feng S-T, Peng Z-P, Chen S-L, Zhou Q, et al. CT-based peritumoral radiomics signatures to predict early recurrence in hepatocellular carcinoma after curative tumor resection or ablation. *Cancer Imaging* 2019;19:11.
- [133] Wang K, Mamidipalli A, Retson T, Bahrami N, Hasenstab K, Blansit K, et al. Automated CT and MRI Liver Segmentation and Biometry Using a Generalized Convolutional Neural Network. *Radiol Artif Intell* 2019;1. <https://doi.org/10.1148/ryai.2019180022>.
- [134] Wang W, Chen Q, Iwamoto Y, Han X, Zhang Q, Hu H, et al. Deep Learning-Based Radiomics Models for Early Recurrence Prediction of Hepatocellular Carcinoma with Multi-phase CT Images and Clinical Data. *Conf Proc IEEE Eng Med Biol Soc* 2019;2019:4881–4.
- [135] Yang D-W, Jia X-B, Xiao Y-J, Wang X-P, Wang Z-C, Yang Z-H. Noninvasive Evaluation of the Pathologic Grade of Hepatocellular Carcinoma Using MCF-3DCNN: A Pilot Study. *Biomed Res Int* 2019;2019:9783106.
- [136] Ahmed Y, Hussein RS, Basha TA, Khalifa AM, Ibrahim AS, Abdelmoaty AS, et al. Detecting liver fibrosis using a machine learning-based approach to the quantification of the heart-induced deformation in tagged MR images. *NMR Biomed* 2020;33:e4215.
- [137] Budai BK, Tóth A, Borsos P, Frank VG, Shariati S, Fejér B, et al. Three-dimensional CT texture analysis of anatomic liver segments can differentiate between low-grade and high-grade fibrosis. *BMC Med Imaging* 2020;20:108.
- [138] Cao S-E, Zhang L-Q, Kuang S-C, Shi W-Q, Hu B, Xie S-D, et al. Multiphase convolutional dense network for the classification of focal liver lesions on dynamic contrast-enhanced computed tomography. *World J Gastroenterol* 2020;26:3660–72.
- [139] Chen W-F, Ou H-Y, Liu K-H, Li Z-Y, Liao C-C, Wang S-Y, et al. In-Series U-Net Network to 3D Tumor Image Reconstruction for Liver Hepatocellular Carcinoma Recognition. *Diagnostics (Basel)* 2020;11. <https://doi.org/10.3390/diagnostics11010011>.
- [140] Doman K, Konishi T, Mekada Y. Lesion Image Synthesis Using DCGANs for Metastatic Liver Cancer Detection. *Adv Exp Med Biol* 2020;1213:95–106.
- [141] Kagadis GC, Drazinos P, Gatos I, Tsantis S, Papadimitroulas P, Spiliopoulos S, et al. Deep learning networks on chronic liver disease assessment with fine-tuning of shear wave elastography image sequences. *Phys Med Biol* 2020;65:215027.
- [142] Kim J, Min JH, Kim SK, Shin S-Y, Lee MW. Detection of Hepatocellular Carcinoma in Contrast-Enhanced Magnetic Resonance Imaging Using Deep Learning Classifier: A Multi-Center Retrospective Study. *Sci Rep* 2020;10:9458.

- [143] Li Q, Yu B, Tian X, Cui X, Zhang R, Guo Q. Deep residual nets model for staging liver fibrosis on plain CT images. *Int J Comput Assist Radiol Surg* 2020;15:1399–406.
- [144] Liang W, Shao J, Liu W, Ruan S, Tian W, Zhang X, et al. Differentiating Hepatic Epithelioid Angiomyolipoma From Hepatocellular Carcinoma and Focal Nodular Hyperplasia via Radiomics Models. *Front Oncol* 2020;10:564307.
- [145] Liu Q-P, Xu X, Zhu F-P, Zhang Y-D, Liu X-S. Prediction of prognostic risk factors in hepatocellular carcinoma with transarterial chemoembolization using multi-modal multi-task deep learning. *EClinicalMedicine* 2020;23:100379.
- [146] Mao B, Zhang L, Ning P, Ding F, Wu F, Lu G, et al. Preoperative prediction for pathological grade of hepatocellular carcinoma via machine learning-based radiomics. *Eur Radiol* 2020;30:6924–32.
- [147] Mokrane F-Z, Lu L, Vavasseur A, Otal P, Peron J-M, Luk L, et al. Radiomics machine-learning signature for diagnosis of hepatocellular carcinoma in cirrhotic patients with indeterminate liver nodules. *Eur Radiol* 2020;30:558–70.
- [148] Nebbia G, Zhang Q, Arefan D, Zhao X, Wu S. Pre-operative Microvascular Invasion Prediction Using Multi-parametric Liver MRI Radiomics. *J Digit Imaging* 2020;33:1376–86.
- [149] Oezdemir I, Wessner CE, Shaw C, Eisenbrey JR, Hoyt K. Tumor Vascular Networks Depicted in Contrast-Enhanced Ultrasound Images as a Predictor for Transarterial Chemoembolization Treatment Response. *Ultrasound Med Biol* 2020;46:2276–86.
- [150] Ponnoprat D, Inkeaw P, Chaijaruwanich J, Traisathit P, Sripan P, Inmutto N, et al. Classification of hepatocellular carcinoma and intrahepatic cholangiocarcinoma based on multi-phase CT scans. *Med Biol Eng Comput* 2020;58:2497–515.
- [151] Schawkat K, Ciritsis A, von Ulmenstein S, Honcharova-Biletska H, Jüngst C, Weber A, et al. Diagnostic accuracy of texture analysis and machine learning for quantification of liver fibrosis in MRI: correlation with MR elastography and histopathology. *Eur Radiol* 2020;30:4675–85.
- [152] Shi W, Kuang S, Cao S, Hu B, Xie S, Chen S, et al. Deep learning assisted differentiation of hepatocellular carcinoma from focal liver lesions: choice of four-phase and three-phase CT imaging protocol. *Abdom Radiol (NY)* 2020;45:2688–97.
- [153] Son JH, Lee SS, Lee Y, Kang B-K, Sung YS, Jo S, et al. Assessment of liver fibrosis severity using computed tomography-based liver and spleen volumetric indices in patients with chronic liver disease. *Eur Radiol* 2020;30:3486–96.
- [154] Wei L, Cui C, Xu J, Kaza R, El Naqa I, Dewaraja YK. Tumor response prediction in 90Y radioembolization with PET-based radiomics features and absorbed dose metrics. *EJNMMI Phys* 2020;7:74.
- [155] Wu Y, White GM, Cornelius T, Gowdar I, Ansari MH, Supanich MP, et al. Deep learning LI-RADS grading system based on contrast enhanced multiphase MRI for differentiation between LR-3 and LR-4/LR-5 liver tumors. *Ann Transl Med* 2020;8:701.
- [156] Yang Q, Wei J, Hao X, Kong D, Yu X, Jiang T, et al. Improving B-mode ultrasound diagnostic performance for focal liver lesions using deep learning: A multicentre study. *EBioMedicine* 2020;56:102777.
- [157] Zhang L, Xia W, Yan Z-P, Sun J-H, Zhong B-Y, Hou Z-H, et al. Deep Learning Predicts Overall Survival of Patients With Unresectable Hepatocellular Carcinoma Treated by Transarterial Chemoembolization Plus Sorafenib. *Front Oncol* 2020;10:593292.
- [158] Byra M, Han A, Boehringer AS, Zhang YN, O'Brien WD Jr, Erdman JW Jr, et al. Liver Fat Assessment in Multiview Sonography Using Transfer Learning With Convolutional Neural Networks. *J Ultrasound Med* 2021. <https://doi.org/10.1002/jum.15693>.
- [159] Che H, Brown LG, Foran DJ, Noshier JL, Hacihaliloglu I. Liver disease classification

from ultrasound using multi-scale CNN. *Int J Comput Assist Radiol Surg* 2021;16:1537–48.

- [160] Chen W, Zhang T, Xu L, Zhao L, Liu H, Gu LR, et al. Radiomics Analysis of Contrast-Enhanced CT for Hepatocellular Carcinoma Grading. *Front Oncol* 2021;11:660509.
- [161] Chen Y, Chen J, Zhang Y, Lin Z, Wang M, Huang L, et al. Preoperative Prediction of Cytokeratin 19 Expression for Hepatocellular Carcinoma with Deep Learning Radiomics Based on Gadoteric Acid-Enhanced Magnetic Resonance Imaging. *J Hepatocell Carcinoma* 2021;8:795–808.
- [162] Chen Y, Xia Y, Tolat PP, Long L, Jiang Z, Huang Z, et al. Comparison of Conventional Gadoteric Acid-Enhanced MRI Features and Radiomics Signatures With Machine Learning for Diagnosing Microvascular Invasion. *AJR Am J Roentgenol* 2021;216:1510–20.
- [163] Das A, Connell M, Khetarpal S. Digital image analysis of ultrasound images using machine learning to diagnose pediatric nonalcoholic fatty liver disease. *Clin Imaging* 2021;77:62–8.
- [164] Gao F, Qiao K, Yan B, Wu M, Wang L, Chen J, et al. Hybrid network with difference degree and attention mechanism combined with radiomics (H-DARnet) for MVI prediction in HCC. *Magn Reson Imaging* 2021;83:27–40.
- [165] Kim DW, Lee G, Kim SY, Ahn G, Lee J-G, Lee SS, et al. Deep learning-based algorithm to detect primary hepatic malignancy in multiphase CT of patients at high risk for HCC. *Eur Radiol* 2021;31:7047–57.
- [166] Li H, He L, Dudley JA, Maloney TC, Somasundaram E, Brady SL, et al. DeepLiverNet: a deep transfer learning model for classifying liver stiffness using clinical and T2-weighted magnetic resonance imaging data in children and young adults. *Pediatr Radiol* 2021;51:392–402.
- [167] Liu P, Tan X-Z, Zhang T, Gu Q-B, Mao X-H, Li Y-C, et al. Prediction of microvascular invasion in solitary hepatocellular carcinoma  $\leq 5$  cm based on computed tomography radiomics. *World J Gastroenterol* 2021;27:2015–24.
- [168] Liu X, Khalvati F, Namdar K, Fischer S, Lewis S, Taouli B, et al. Can machine learning radiomics provide pre-operative differentiation of combined hepatocellular cholangiocarcinoma from hepatocellular carcinoma and cholangiocarcinoma to inform optimal treatment planning? *Eur Radiol* 2021;31:244–55.
- [169] Nakai H, Fujimoto K, Yamashita R, Sato T, Someya Y, Taura K, et al. Convolutional neural network for classifying primary liver cancer based on triple-phase CT and tumor marker information: a pilot study. *Jpn J Radiol* 2021;39:690–702.
- [170] Nowak S, Mesropyan N, Faron A, Block W, Reuter M, Attenberger UI, et al. Detection of liver cirrhosis in standard T2-weighted MRI using deep transfer learning. *Eur Radiol* 2021;31:8807–15.
- [171] Pickhardt PJ, Blake GM, Graffy PM, Sandfort V, Elton DC, Perez AA, et al. Liver Steatosis Categorization on Contrast-Enhanced CT Using a Fully Automated Deep Learning Volumetric Segmentation Tool: Evaluation in 1204 Healthy Adults Using Unenhanced CT as a Reference Standard. *AJR Am J Roentgenol* 2021;217:359–67.
- [172] Sheng R, Huang J, Zhang W, Jin K, Yang L, Chong H, et al. A Semi-Automatic Step-by-Step Expert-Guided LI-RADS Grading System Based on Gadoteric Acid-Enhanced MRI. *J Hepatocell Carcinoma* 2021;8:671–83.
- [173] Tiyyarattanachai T, Apiparakoon T, Marukatat S, Sukcharoen S, Geratikornsukupuk N, Anukulkarnkusol N, et al. Development and validation of artificial intelligence to detect and diagnose liver lesions from ultrasound images. *PLoS One* 2021;16:e0252882.
- [174] Wan Y, Zheng Z, Liu R, Zhu Z, Zhou H, Zhang X, et al. A Multi-Scale and Multi-Level



Fusion Approach for Deep Learning-Based Liver Lesion Diagnosis in Magnetic Resonance Images with Visual Explanation. *Life* 2021;11.  
<https://doi.org/10.3390/life11060582>.

- [175] Wang M, Fu F, Zheng B, Bai Y, Wu Q, Wu J, et al. Development of an AI system for accurately diagnose hepatocellular carcinoma from computed tomography imaging data. *Br J Cancer* 2021;125:1111–21.
- [176] Zhang Y, Lv X, Qiu J, Zhang B, Zhang L, Fang J, et al. Deep Learning With 3D Convolutional Neural Network for Noninvasive Prediction of Microvascular Invasion in Hepatocellular Carcinoma. *J Magn Reson Imaging* 2021;54:134–43.
- [177] Zheng R, Shi C, Wang C, Shi N, Qiu T, Chen W, et al. Imaging-Based Staging of Hepatic Fibrosis in Patients with Hepatitis B: A Dynamic Radiomics Model Based on Gd-EOB-DTPA-Enhanced MRI. *Biomolecules* 2021;11.  
<https://doi.org/10.3390/biom11020307>.
